# Supplementary material for: Novel Conductive and Redox-Active Molecularly Imprinted Polymer for Direct Quantification of Perfluorooctanoic Acid
Source: PubMed Central journal article supplement (PMC11325644; doi:10.1021/acs.estlett.4c00557), 2024-08-05
Supplement: ez4c00557_si_001.pdf [file ez4c00557_si_001.pdf]

1 **SUPPORTING INFORMATION**

2  
3 **Novel Conductive and Redox-Active Molecularly Imprinted Polymer for Direct**  
4 **Quantification of Perfluorooctanoic Acid**

5  
6 Sumbul Hafeez<sup>1</sup>, Aysha Khanam<sup>1</sup>, Han Cao<sup>1</sup>, Chaplin Brian P.<sup>2</sup>, Wenqing Xu<sup>1,\*</sup>

7  
8 <sup>1</sup>Department of Civil and Environmental Engineering, Villanova University, Villanova,  
9 Pennsylvania 19085, United States

10 <sup>2</sup>Department of Chemical Engineering, University of Illinois at Chicago, 929 W. Taylor St.,  
11 14 Chicago, IL 60607, United States

12  
13 \*Corresponding author:

14  
15 Dr. Wenqing Xu

16  
17 Email: [wenqing.xu@villanova.edu](mailto:wenqing.xu@villanova.edu)

18  
19  
20 Phone : 610-519-8549

21  
22 **16 pages**

23 **4 tables**

24 **8 figures**

25 **6 textes**

26

27 **Text S1:** Chemical and Reagents

28 3,4-ethylenedioxythiophene hydroxymethyl (EDOT-MeOH,  $\geq 95\%$ ), 4-carboxy-2,2,6,6-tetra  
29 methylpiperidinyloxy (TEMPO-COOH,  $\geq 97\%$ ), 4-(dimethylamino)pyridine (DMAP,  $\geq 99\%$ ), *N*-  
30 (3-dimethylaminopropyl)-*N'*-ethylcarbodiimide hydrochloride (EDC,  $\geq 97\%$ ) and anhydrous  
31 dichloromethane (DCM,  $\geq 99\%$ ), were obtained from TCI (Tokyo, Japan) and used as received.  
32 Sodium chloride (NaCl,  $\geq 99.5\%$ ) was purchased from Fisher Scientific (Pittsburgh, PA) and used  
33 as received. Perfluorooctanoic acid (PFOA,  $\geq 97\%$ ), perfluorobutanoic acid (PFBA,  $\geq 98\%$ ),  
34 Perfluorooctanesulfonic acid solution (PFOS,  $\geq 97\%$ ), dry tetrabutylammonium  
35 hexafluorophosphate (TBAPF<sub>6</sub>,  $\geq 99\%$ ), phenylhydrazine (97%), anhydrous magnesium sulfate  
36 (MgSO<sub>4</sub>,  $\geq 99.7\%$ ), hexane (99.9%, HPLC Grade), dichloromethane (99.9%, HPLC Grade), and  
37 ethyl acetate (99.9%, HPLC Grade) were purchased from Sigma-Aldrich (Milwaukee, MI) and  
38 used as received. 6:2 Fluorotelomer sulfonamide alkylbetaine (6:2 FTAB,  $\geq 97\%$ ) was obtained  
39 from TRC (Connecticut, USA). Suwannee River natural organic matter (SRNOM) was purchased  
40 from the International Humic Substances Society (IHSS, MN, USA). Deionized (DI) water was  
41 purified by a Mili-Q-plus purification system ( $\geq 18.2$  M $\Omega$  cm at 25 °C; Millipore Sigma, MO,  
42 USA). Surface water (SW) was collected from a pond (latitude and longitude of 40.310329 and -  
43 74.644513°, respectively) in West Windsor Township, New Jersey. The sampling location and the  
44 surface water composition are provided in **Figure S7** and **Table S3**.

45 **Text S2:** Material Characterization.

46 <sup>1</sup>H nuclear magnetic resonance (NMR) spectra were recorded for EDOT-TEMPO monomer at  
47 25 °C on a JEOL ECZ400S, 400 MHz spectrometer using deuterated chloroform as a solvent and  
48 tetramethyl silane as an internal standard. Fourier Transform Infrared Spectroscopy measurements

49 (FTIR) were recorded on a Perkin Elmer 1600 Series FTIR Spectrophotometer. The spectrum was  
50 collected in 32 scans with a resolution of  $4\text{ cm}^{-1}$  in the  $4000\text{-}400\text{ cm}^{-1}$  range.

### 51 **Text S3:** Chemical Analysis

52 The non-purgeable organic carbon (NPOC) was analyzed with a TOC analyzer (TOC-L,  
53 Shimadzu, Japan). The cations ( $\text{Na}^+$ ,  $\text{K}^+$ ,  $\text{Mg}^+$ , and  $\text{Ca}^+$ ) and anions ( $\text{Cl}^-$  and  $\text{SO}_4^{2-}$ ) were analyzed  
54 with an ion chromatography (IC) coupled with a conductivity detector using a Shodex YS-50  
55 column (for cations) or Shodex SI-52 4E column (for anion) (Showa Denko, Tokyo, Japan),  
56 respectively. The turbidity and conductivity of the surface water sample was measured on a  
57 turbidity meter (2100Q, HACH) and a conductivity meter (HQ40d, HACH), respectively. PFAS  
58 analysis was performed on an Agilent 6470A triple quadrupole LC/MS (LC/QQQ-MS) system  
59 C18 column (Agilent poroshell 120 EC,  $50 \times 3\text{ mm}$ ,  $1.8\text{ }\mu\text{m}$ ) with the mobile phases of solvent A  
60 (5 mM ammonium acetate in distilled water) and B (5 mM ammonium acetate in 100% methanol).  
61 The oven temperature was set at  $40\text{ }^\circ\text{C}$ . The injection volume of each sample was  $5\text{ }\mu\text{L}$  with a flow  
62 rate of  $0.5\text{ ml}\cdot\text{min}^{-1}$ . Prior to analysis, all samples were filtered by  $0.22\text{-}\mu\text{m}$  PES filters with 1-mL  
63 syringes into polypropylene 1.5-mL autosampler vials (ThermoFisher) with polypropylene caps.  
64 An Agilent 6470A triple quadrupole LC-/MS/MS system was used to detect quantify the  
65 concentrations of EPA 537 standards, EPA 533 standards, and intermediates (C2 ~ C7) based on  
66 USEPA Method 533 following mass calibration and initial calibration. Analytical sequences will  
67 include instrument blanks, instrument sensitivity checks, calibration verification standards,  
68 qualitative identification standards, method blanks, ongoing precision and recovery standards  
69 (OPRs), and experimental samples. A C18 column (Agilent poroshell 120 EC,  $50 \times 3\text{ mm}$ ,  $1.8\text{ }\mu\text{m}$ )  
70 was used for separation at  $40\text{ }^\circ\text{C}$  using a mobile phase of solvent A (5 mM ammonium acetate in  
71 distilled water) and B (5 mM ammonium acetate in 100% methanol). The injection volume of each

72 sample is 5  $\mu\text{L}$  with a flow rate of  $0.5 \text{ ml}\cdot\text{min}^{-1}$ . The EPA 533 standard (500 ppb) (Lot  
73 No.537PDSLRL11021) purchased from Wellington laboratories were diluted with 100% methanol  
74 to, 100 ppt, 250 ppt, 500 ppt, 1 ppb, 2.5 ppb, 5 ppb, 10 ppb, 25 ppb and 50 ppb, respectively, to  
75 establish the calibration curve.

76 **Text S4:** Preparation of MIPs.

77 **Synthesis and purification of 3,4-ethylenedioxythiophene-2,2,6,6-tetramethyl piperidinyloxy**  
78 **(EDOT-TEMPO) monomer.** We prepared the 3,4-ethylenedioxythiophene-2,2,6,6-  
79 tetramethylpiperidinyloxy (EDOT-TEMPO) monomer by the esterification reaction between 3,4-  
80 ethylenedioxythiophene hydroxymethyl and 4-carboxy-2,2,6,6-tetramethyl piperidinyloxy in the  
81 presence of *N*-(3-dimethylaminopropyl)-*N'*-ethylcarbodiimidehydrochloride (EDC) and 4-  
82 (dimethylamino) pyridine under dry dichloromethane (DCM) following the **Scheme S1**.<sup>3,4</sup> Briefly,  
83 TEMPO-COOH (1.4 mmol, 280 mg,) EDOT-MeOH (2.18 mmol, 380 mg), and DMAP (1.34  
84 mmol, 17 mg) were dissolved in 10 mL of dry DCM in a 100 mL round bottom flask for 5 minutes  
85 under stirring at 0 °C. After 5 min, EDC (1.52 mmol, 310 mg) was dissolved in 4 mL of dry DCM  
86 and added dropwise into the round bottom flask at 0°C under stirring. The reactor was then warmed  
87 up to room temperature and stirred for 72 h. After 72 h, the reaction solution was diluted with 20  
88 mL DCM, and the organic phase was washed with NaCl (40 mL) and water (80 mL), then dried  
89 over anhydrous  $\text{MgSO}_4$  and filtered using 11  $\mu\text{m}$  Whatman paper. The filtrate was purified by  
90 column chromatography ( $\text{SiO}_2$ , *n*-hexane/ethyl acetate 1:3 volume ratio) and followed by  
91 recrystallization in cold *n*-hexane. The obtained EDOT-TEMPO monomer appeared as orange  
92 color crystals, as shown in **Figure S2**. For  $^1\text{H}$  NMR analysis, phenylhydrazine was added to reduce  
93 the nitroxide free radical to its hydroxylamine derivative.

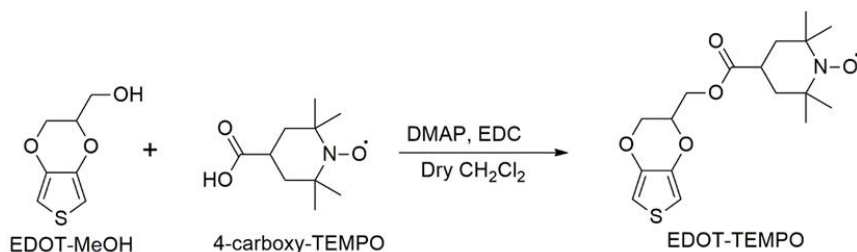

95 **Scheme S1.** Scheme for the synthesis of EDOT-TEMPO monomer via the esterification reaction  
 96 between EDOT-MeOH and TEMPO-COOH at room temperature for 72 h.

97 **Electrochemical polymerization of poly-3,4-ethylenedioxythiophene-2,2,6,6-**  
 98 **tetramethylpiperidinyloxy (PEDOT-TEMPO-MIP) and non-molecularly imprinted**  
 99 **polymers (PEDOT-TEMPO-NIP).** PEDOT-TEMPO-MIP and PEDOT-TEMPO-NIP were  
 100 prepared by the electrochemical polymerization of EDOT-TEMPO monomer following a method  
 101 established from previous studies.<sup>1,2</sup> The reaction scheme was shown in **Scheme S2**. The glassy  
 102 carbon electrode was first polished using 0.3 and 0.05  $\mu\text{m}$  alumina slurry and washed using  
 103 deionized water for 5 min under a sonication bath. A standard three-electrode configuration was  
 104 employed with a 3 mm glassy carbon working electrode (BASi, IN, USA), a coiled platinum wire  
 105 counter electrode (BASi, IN, USA), and an Ag/AgCl reference electrode in 3 M KCl (BASi, IN,  
 106 USA). All potentials were applied against Ag/AgCl reference electrode in 0.1 mol·L<sup>-1</sup> TBAPF<sub>6</sub>  
 107 DCM solution. A CH Instruments 630C potentiostat (Austin, TX) was used for electrochemical  
 108 polymerization and PFOA quantification. Specifically, the electrochemical polymerization of the  
 109 EDOT-TEMPO (1 mmol·L<sup>-1</sup>) was performed in 0.1 mol·L<sup>-1</sup> TBAPF<sub>6</sub> in DCM at a scan rate of 20  
 110 mV·s<sup>-1</sup> for 10 sweep cycles on the surface of the glassy electrode under cyclic voltammetry (CV)  
 111 with a potential range from 0-1.5 V. MIPs were prepared in the presence of 1 mmol·L<sup>-1</sup> of PFOA,  
 112 whereas NIP was synthesized under the same condition except in the absence of PFOA. After the  
 113 completion of the electrochemical polymerization, the electrode was washed with deionized water

114 to remove the PFOA template. Herein, we have chosen DI water for PFOA template removal  
115 because organic solvents such as methanol, ethanol, and acetone can dissolve PEDOT-TEMPO-  
116 MIP.<sup>3-5</sup> Moreover, the use of DI for template removal and MIP regeneration is also cost-effective  
117 compared to other technologies where organic solvents are often employed.

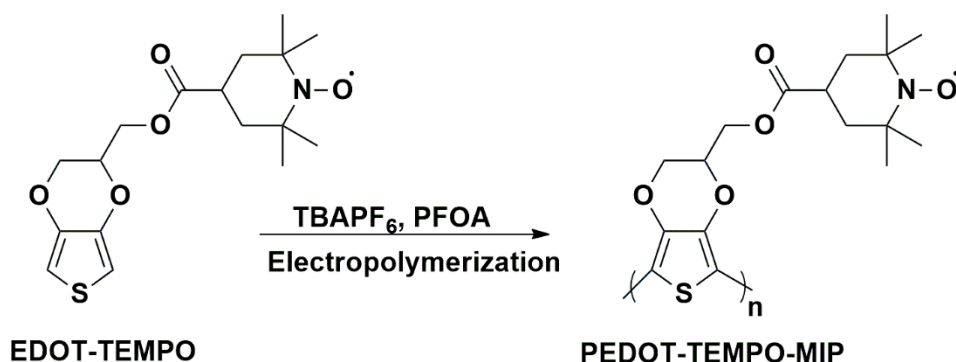

119 **Scheme S2.** Scheme for the synthesis of PEDOT-TEMPO-MIP using 1 mmol·L<sup>-1</sup> EDOT-TEMPO  
120 and 1 mmol·L<sup>-1</sup> PFOA in a 0.1 M TBAPF<sub>6</sub> dichloromethane solution, employing a scan rate of 20  
121 mV·s<sup>-1</sup> and a potential range of 0-1.5 V.

122 **Text S5:** Method Detection Limit (MDL) calculation

123 The MDL was calculated using the standard deviation (SD) of seven replicates at the lowest PFOA  
124 concentration used for the rebinding experiments (i.e., 4.14×10<sup>-10</sup> g·L<sup>-1</sup> and 4.14×10<sup>-9</sup> g·L<sup>-1</sup>)  
125 following an EPA standard method.<sup>6,7</sup> Specifically, the standard deviation of the measured  
126 concentrations of seven replicates were determined using the calibration curve (i.e., Figure 2,  
127 R<sup>2</sup>=0.98), and the MDL was calculated following the equation below:

128

$$\text{MDL} = (n-1, 1-\alpha=0.99) \cdot \text{SD}$$

129 where MDL represents the method detection limit,  $t_{(n-1, 1-\alpha=0.99)}$  represents Student's t-value for a  
130 single tailed 99<sup>th</sup> percentile at the degrees of freedom of 6, and SD represents the standard deviation  
131 derived from 7 replicates.

132 **Text S6:** Characterization of EDOT-TEMPO monomer

133 The <sup>1</sup>H NMR spectrum (**Figure S3**) of EDOT-TEMPO shows two distinctive resonance peaks at  
134 4.6 and 4.2 ppm corresponding to the methylene protons adjacent to carbonyl carbon bonded to  
135 the ester oxygen (-CH<sub>2</sub>-COO-), suggesting the successful esterification of EDOT-MeOH and  
136 TEMPO-COOH.<sup>44,45</sup> The resonance at 1.2, 1.4, 1.8, and 2.6 ppm represent the TEMPO-COOH  
137 protons, while those at 6.4 and 3.9 ppm correspond to the EDOT-MeOH protons.<sup>44,45</sup> The  
138 resonance peaks at 6.8 and 7.15 ppm (crossed out in red) represent the phenylhydrazine protons,  
139 which were used to reduce the nitroxide free radical to its hydroxyl derivative.<sup>44,45</sup> Our FTIR results  
140 further support these observations (**Figure S4**). Specifically, the vibrational stretching peak shift  
141 from 1690 cm<sup>-1</sup> to 1732 cm<sup>-1</sup> corresponds to the conversion of carboxylic carbonyl to ester  
142 carbonyl. The disappearance of the hydroxyl peak at 3200 cm<sup>-1</sup> indicates successful esterification  
143 of EDOT-MeOH and TEMPO-COOH.<sup>44,45</sup>

144

145

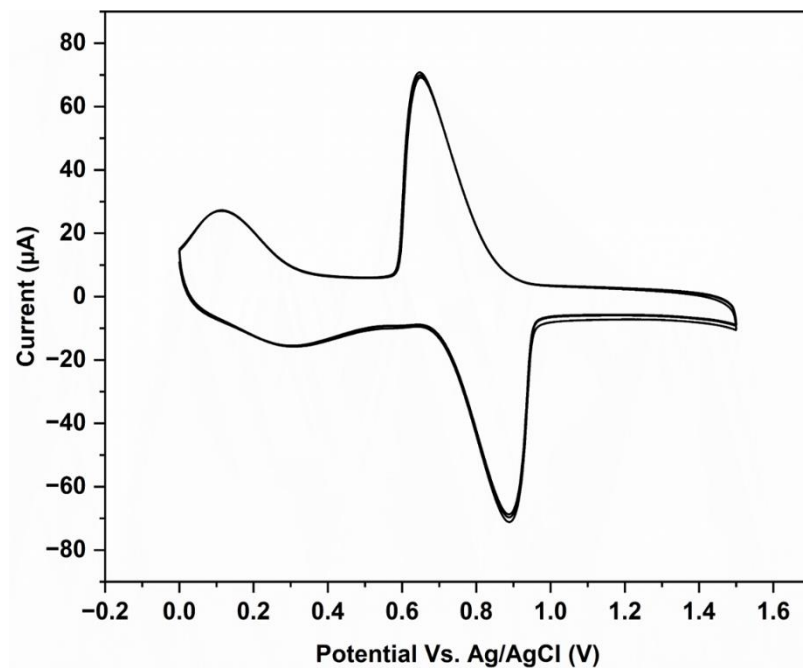

146

147 **Figure S1.** Three cycles of cyclic voltammograms (CV) scans of PEDOT-TEMPO-MIP after  
148 template removal in 0.1 M TBAPF<sub>6</sub> dichloromethane solution.

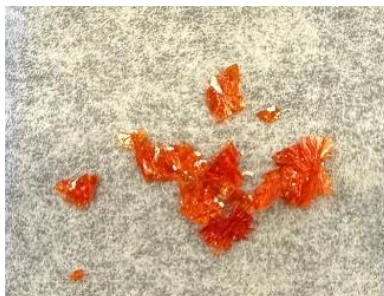

149

150

151 **Figure S2.** Orange color crystal of EDOT-TEMPO monomer after purification.

152



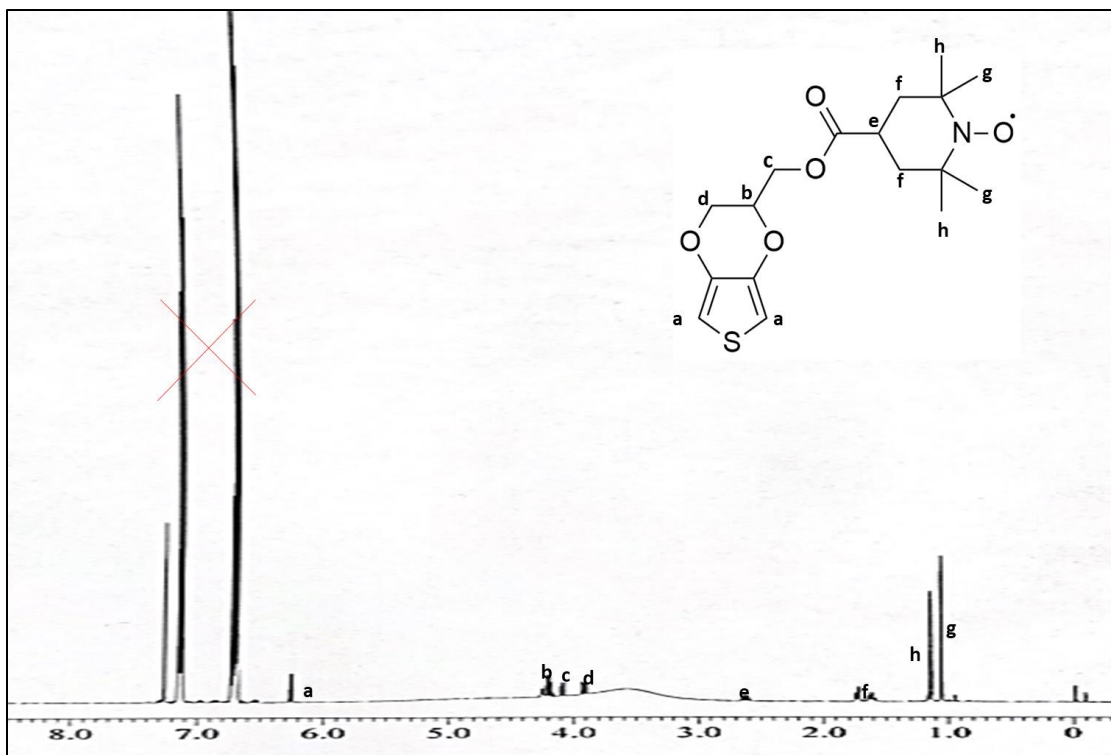

153

154 **Figure S3.** <sup>1</sup>H NMR spectrum of EDOT-TEMPO synthesized *via*. the condensation reaction of  
 155 EDOT-MeOH and TEMPO-COOH at room temperature for 72 h.

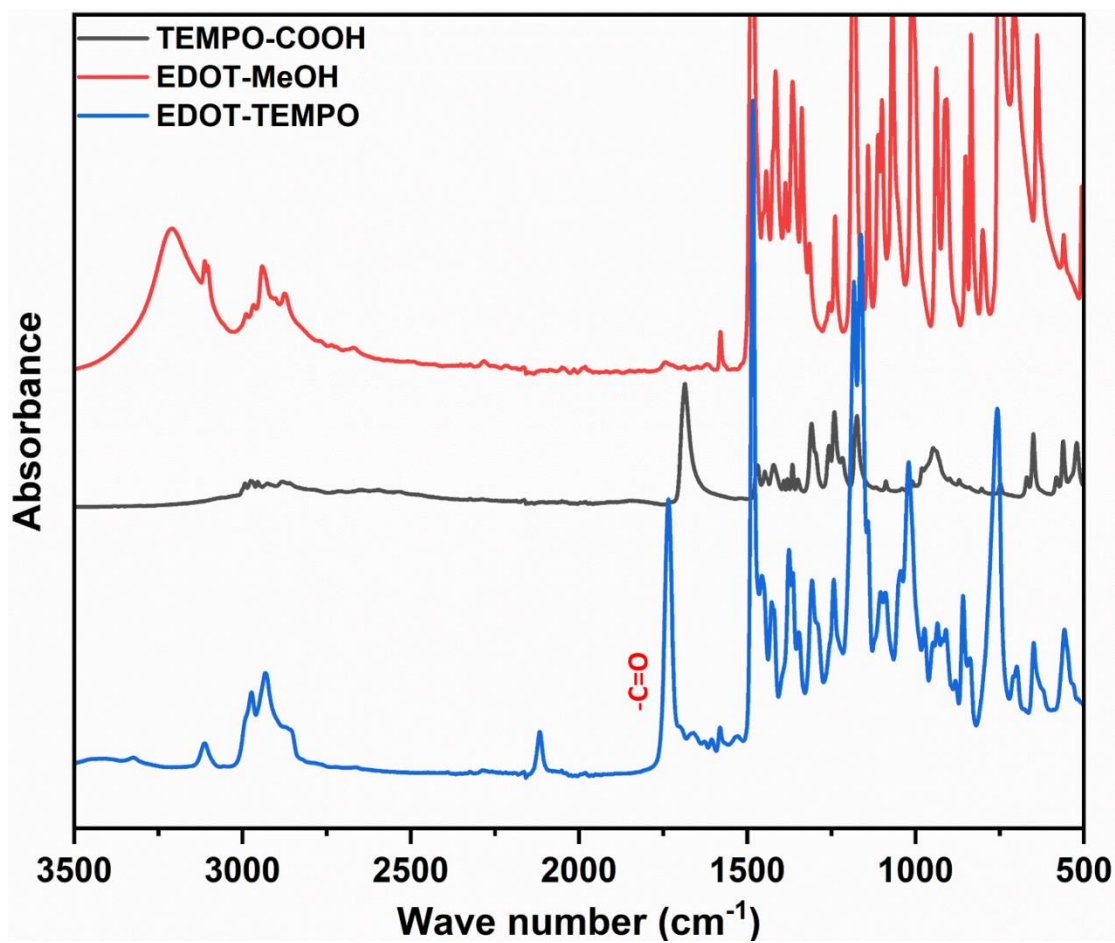

156

157 **Figure S4.** FTIR spectrum of EDOT-TEMPO synthesized *via.* the condensation reaction of  
158 EDOT-MeOH and TEMPO-COOH at room temperature for 72 h.

159

160

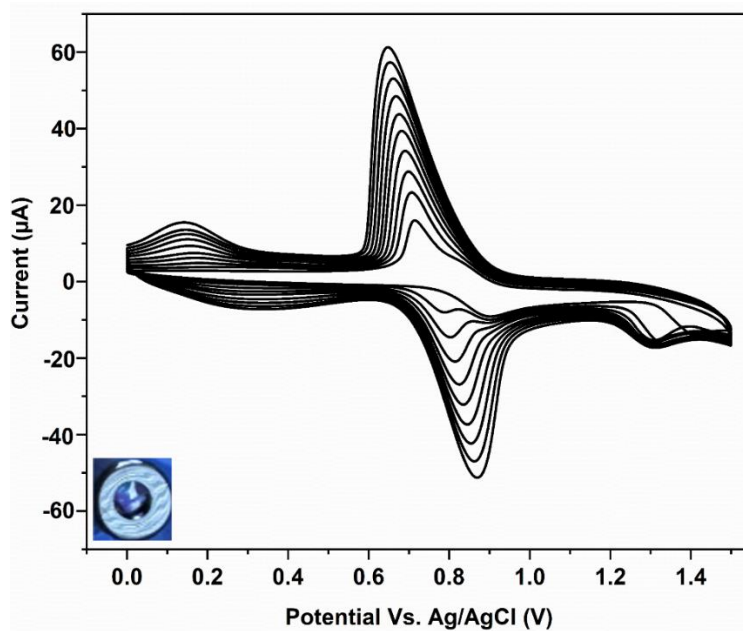

161  
 162 **Figure S5.** Ten cycles of CV scans during electropolymerization of PEDOT-TEMPO-MIP using  
 163 EDOT-TEMPO in 0.1 M TBAPF<sub>6</sub> dichloromethane solution. The scan rate was at 20 mV·s<sup>-1</sup> and  
 164 the potential used range from 0-1.5 V. The inset image shows the blue color film deposited after  
 165 electropolymerization.

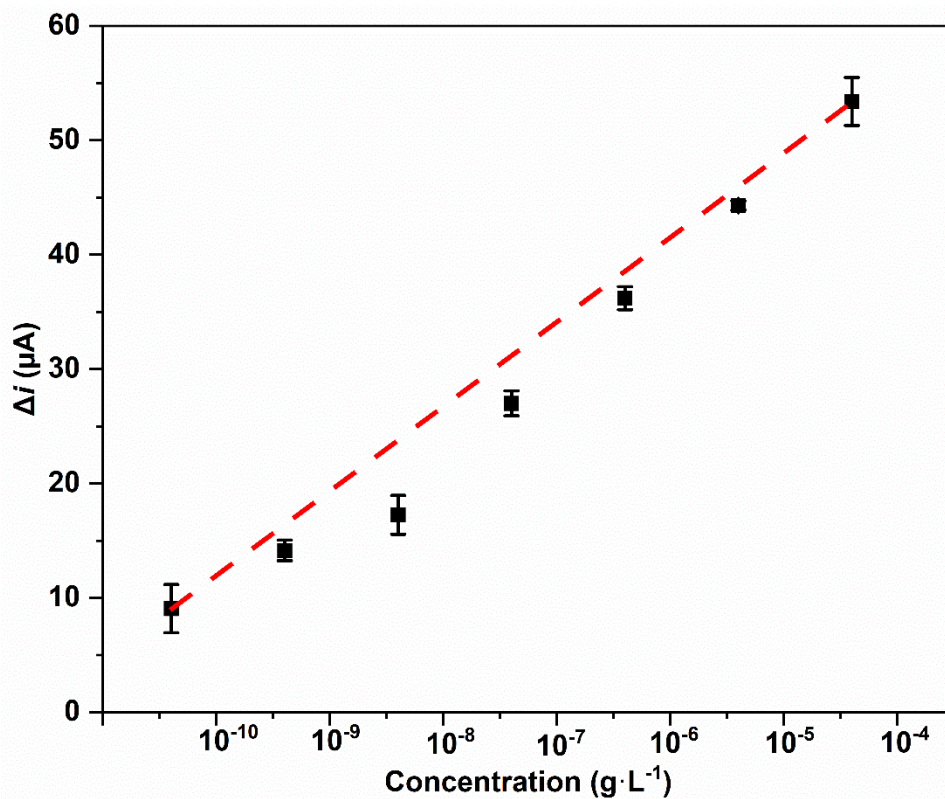

167 **Figure S6.** The calibration curve of the current density decreases at the anodic peak of TEMPO  
168 (y-axis) vs. PFOA concentrations ranging from  $4.14 \times 10^{-10}$  to  $4.14 \times 10^{-4} \text{ g} \cdot \text{L}^{-1}$  (x-axis). The current  
169 density was recorded from the CV scans of PEDOT-TEMPO-MIP after being exposed to PFOA  
170 for 240 minutes. The error bar at each point was derived from triplicate measurements. The linear  
171 regression is  $y = 0.75x - 0.15$  ( $R^2 = 0.98$ ).

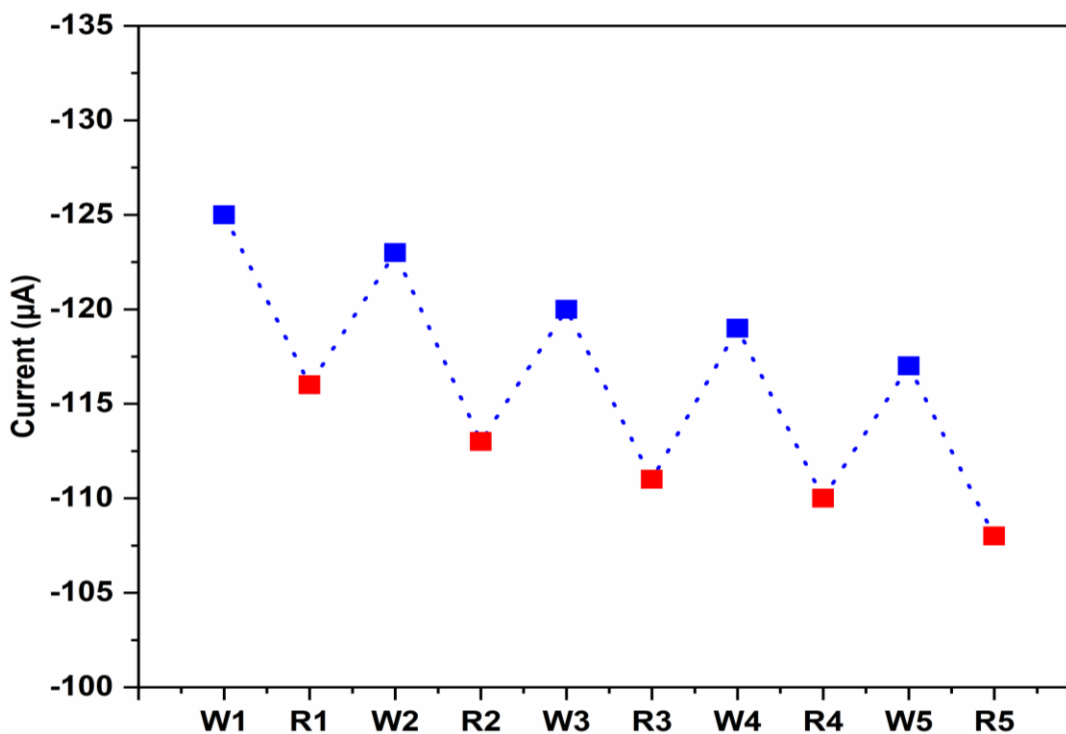

172  
173 **Figure S7.** The relative changes in the current density of TEMPO's anodic peak at 0.87 V over 5  
174 cycles of washing (template removal) and rebinding (when exposed to  $4.14 \times 10^{-9} \text{ g} \cdot \text{L}^{-1}$  PFOA).  
175 Results from the washing and rebinding cycles are abbreviated as RX and WX, where X represents  
176 the number of cycles.

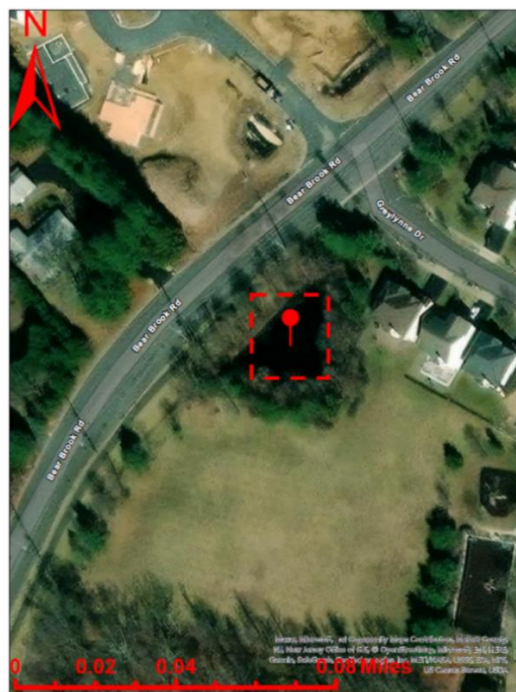

177  
 178 **Figure S8.** The sampling location of the surface water from a pond near West Windsor Township,  
 179 New Jersey, USA (40.310329°, -74.644513°).

180 **Table S1.** The decrease in current density of the anodic peak of TEMPO during PFOA rebinding  
 181 at different time intervals.

| <b>Time<br/>(minutes)</b> | <b><math>\Delta i / i_0\%</math><br/>(<math>4.14 \times 10^{-4} \text{ g} \cdot \text{L}^{-1}</math><br/><sup>1</sup> PFOA)</b> | <b><math>\Delta i / i_0\%</math><br/>(<math>4.14 \times 10^{-8} \text{ g} \cdot \text{L}^{-1}</math><br/>PFOA)</b> | <b><math>\Delta i / i_0\%</math><br/>(<math>4.14 \times 10^{-9} \text{ g} \cdot \text{L}^{-1}</math><br/>PFOA)</b> | <b><math>\Delta i / i_0\%</math><br/>(<math>4.14 \times 10^{-10} \text{ g} \cdot \text{L}^{-1}</math><br/>PFOA)</b> |
|---------------------------|---------------------------------------------------------------------------------------------------------------------------------|--------------------------------------------------------------------------------------------------------------------|--------------------------------------------------------------------------------------------------------------------|---------------------------------------------------------------------------------------------------------------------|
| 2                         | 19.4 %                                                                                                                          | 2.0 %                                                                                                              | 0 %                                                                                                                | 0%                                                                                                                  |
| 5                         | 25.6 %                                                                                                                          | 3.9 %                                                                                                              | 2.1 %                                                                                                              | 0%                                                                                                                  |
| 30                        | 37.3%                                                                                                                           | 15.3 %                                                                                                             | 7.3 %                                                                                                              | 0%                                                                                                                  |
| 60                        | 48.5%                                                                                                                           | 24.8 %                                                                                                             | 15.8 %                                                                                                             | 10.0%                                                                                                               |
| 90                        | 56.8%                                                                                                                           | 35.4 %                                                                                                             | 22.2 %                                                                                                             | 15.0%                                                                                                               |
| 120                       | 72.1%                                                                                                                           | 47.6 %                                                                                                             | 31.6 %                                                                                                             | 18.5%                                                                                                               |
| 150                       | 80.0%                                                                                                                           | 56.4 %                                                                                                             | 40.4 %                                                                                                             | 30%                                                                                                                 |

|     |       |        |        |       |
|-----|-------|--------|--------|-------|
| 180 | 85.0% | 65.4 % | 59.7 % | 48.3% |
| 210 | 86.6% | 74.1 % | 68.9 % | 67.5% |
| 240 | 87.3% | 78.5 % | 71.5 % | 69.1% |

182

183 **Table S2.** The decrease in current density of the anodic peak of TEMPO after being exposed to  
 184 PFOA in a concentration range of  $4.14 \times 10^{-4} \text{ g} \cdot \text{L}^{-1}$  to  $4.14 \times 10^{-9} \text{ g} \cdot \text{L}^{-1}$  for 5 minutes.

| Concentration ( $\text{g} \cdot \text{L}^{-1}$ ) | $\Delta i = i - i_0$ ( $\mu\text{A}$ ) |
|--------------------------------------------------|----------------------------------------|
| $4.14 \times 10^{-4}$                            | $25.6 \pm 0.8$                         |
| $4.14 \times 10^{-5}$                            | $20.7 \pm 0.5$                         |
| $4.14 \times 10^{-6}$                            | $14.1 \pm 1.3$                         |
| $4.14 \times 10^{-7}$                            | $9.9 \pm 0.8$                          |
| $4.14 \times 10^{-8}$                            | $3.9 \pm 1.2$                          |
| $4.14 \times 10^{-9}$                            | $2.1 \pm 0.5$                          |

185  $i$  = current density at the anodic peak of TEMPO after exposed to PFOA for 5 minutes,  $i_0$  = current  
 186 density at the anodic peak of TEMPO after template removal.

187

188 **Table S3:** Reproducibility of PFOA ( $4.14 \times 10^{-9} \text{ g L}^{-1}$ ) measurements using three PEDOT-  
 189 TEMPO-MIP electrodes

| MIP electrode | $i$    | $i_0$  | $\Delta i = i - i_0$ ( $\mu\text{A}$ ) |
|---------------|--------|--------|----------------------------------------|
| 1             | -118.0 | -126.4 | 8.4                                    |
| 2             | -115.0 | -124.0 | 9.0                                    |
| 3             | -117.7 | -127.0 | 9.3                                    |

190  $i$  = current density at the anodic peak of TEMPO after exposed to PFOA for 240 minutes,  $i_0$  = current  
 191 density at the anodic peak of TEMPO after template removal.

192

193

194

195

196

197

198 **Table S4.** The chemical composition of the collected surface water sample.

| Analyte                            | Units               | Value     |
|------------------------------------|---------------------|-----------|
| <b>Turbidity</b>                   | NTU                 | 1.2±0.03  |
| <b>NPOC</b>                        | mg·L <sup>-1</sup>  | 7.3±0.40  |
| <b>Conductivity</b>                | μS·cm <sup>-1</sup> | 69.9±1.9  |
| <b>Na<sup>+</sup></b>              | mg·L <sup>-1</sup>  | 8.42±0.08 |
| <b>K<sup>+</sup></b>               | mg·L <sup>-1</sup>  | 1.58±0.01 |
| <b>Mg<sup>+</sup></b>              | mg·L <sup>-1</sup>  | 0.95±0.01 |
| <b>Ca<sup>+</sup></b>              | mg·L <sup>-1</sup>  | 2.67±0.03 |
| <b>Cl<sup>-</sup></b>              | mg·L <sup>-1</sup>  | 7.83±0.13 |
| <b>SO<sub>4</sub><sup>2-</sup></b> | mg·L <sup>-1</sup>  | 0.73±0.10 |

199

200 **References:**

- 201 (1) Casado, N.; Hernández, G.; Veloso, A.; Devaraj, S.; Mecerreyes, D.; Armand, M. PEDOT  
202 Radical Polymer with Synergetic Redox and Electrical Properties. *ACS Macro Lett.* **2016**,  
203 5 (1), 59–64. <https://doi.org/10.1021/acsmacrolett.5b00811>.
- 204 (2) Schwartz, P. O.; Pejic, M.; Wachtler, M.; Bäuerle, P. Synthesis and Characterization of  
205 Electroactive PEDOT-TEMPO Polymers as Potential Cathode Materials in Rechargeable  
206 Batteries. *Synth. Met.* **2018**, 243 (June), 51–57.  
207 <https://doi.org/10.1016/j.synthmet.2018.04.005>.
- 208 (3) Cao, F.; Wang, L.; Ren, X.; Sun, H. Synthesis of a Perfluorooctanoic Acid Molecularly  
209 Imprinted Polymer for the Selective Removal of Perfluorooctanoic Acid in an Aqueous  
210 Environment. *J. Appl. Polym. Sci.* **2016**, 133 (15), 1–10.  
211 <https://doi.org/10.1002/app.43192>.
- 212 (4) Yu, Q.; Deng, S.; Yu, G. Selective Removal of Perfluorooctane Sulfonate from Aqueous  
213 Solution Using Chitosan-Based Molecularly Imprinted Polymer Adsorbents. *Water Res.*  
214 **2008**, 42 (12), 3089–3097. <https://doi.org/10.1016/j.watres.2008.02.024>.
- 215 (5) Cao, F.; Wang, L.; Tian, Y.; Wu, F.; Deng, C.; Guo, Q.; Sun, H.; Lu, S. Synthesis and  
216 Evaluation of Molecularly Imprinted Polymers with Binary Functional Monomers for the  
217 Selective Removal of Perfluorooctanesulfonic Acid and Perfluorooctanoic Acid. *J.*  
218 *Chromatogr. A* **2017**, 1516, 42–53. <https://doi.org/10.1016/j.chroma.2017.08.023>.
- 219 (6) U.S. EPA. Definition and Procedure for the Determination of the Method Detection  
220 Limit—Revision 1.11. *Epa 821-R-16-006* **2016**, No. December, 1–8.
- 221 (7) Li, Z.; Chen, T.; Cui, F.; Xie, Y.; Xu, W. Impact of Chitosan and Polyacrylamide on  
222 Formation of Carbonaceous and Nitrogenous Disinfection By-Products. *Chemosphere*  
223 **2017**, 178, 26–33. <https://doi.org/10.1016/j.chemosphere.2017.02.140>.

224  
225
